# Supplementary material for: Investigations on the complexation and binding mechanism of bovine serum albumin with Ag-doped TiO2 nanoparticles
Source: Royal Society of Chemistry journal article supplement (doi:10.1039/d4cp02056a), 2024-01-01
Supplement: d4cp02056a1.pdf [file d4cp02056a1.pdf]

### Supplementary data

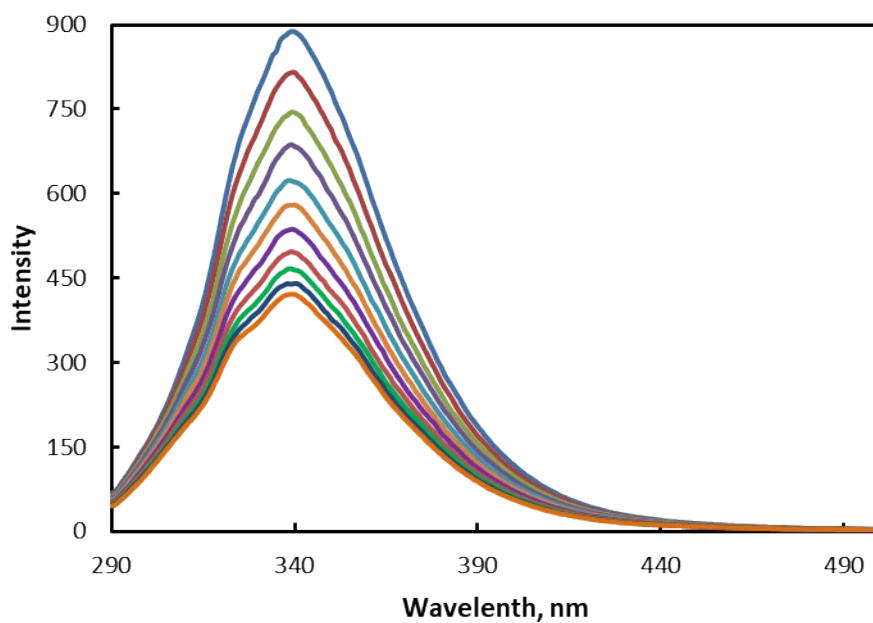

**Fig. S1.** Fluorescence spectra of BSA (2.5  $\mu\text{M}$ ) upon the addition of Ag-doped  $\text{TiO}_2$  NPs from 0 to 2.25  $\mu\text{M}$  at 300 K in the presence of digitoxin (2.5  $\mu\text{M}$ ).

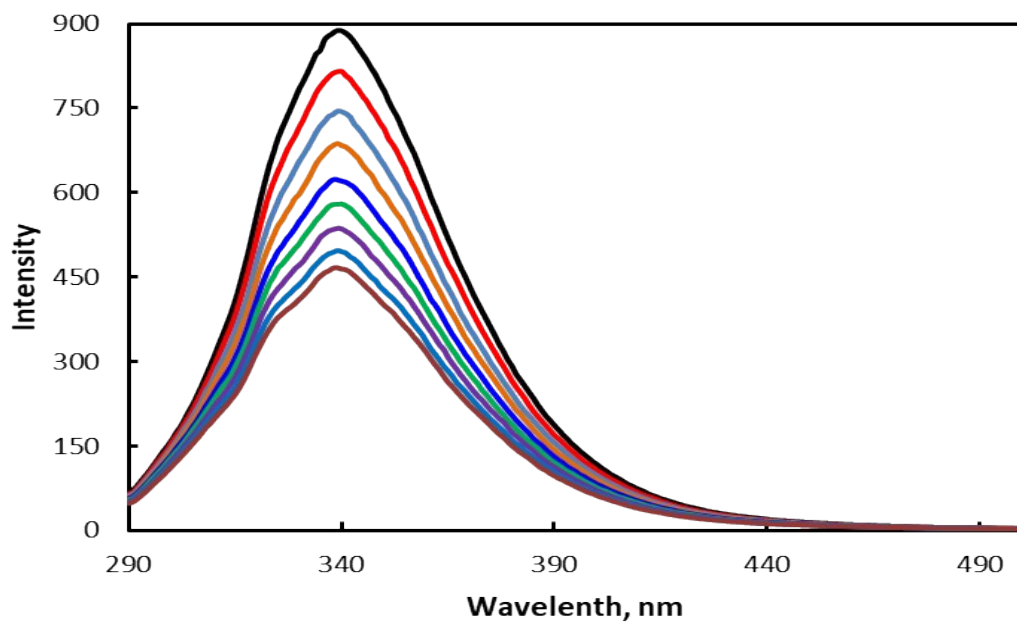

**Fig. S2.** Fluorescence spectra of BSA (2.5  $\mu\text{M}$ ) upon the addition of Ag-doped TiO<sub>2</sub> NPs from 0 to 2.25  $\mu\text{M}$  at 300 K in the presence of ibuprofen (2.5  $\mu\text{M}$ ).

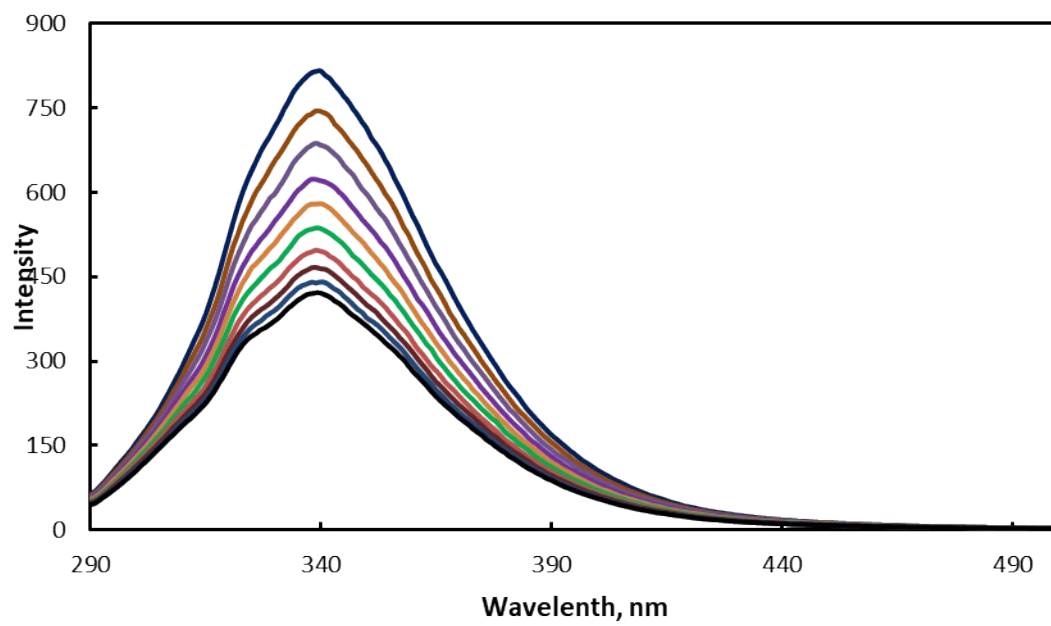

**Fig. S3.** Fluorescence spectra of BSA (2.5  $\mu\text{M}$ ) upon the addition of Ag-doped  $\text{TiO}_2$  NPs from 0 to 2.25  $\mu\text{M}$   $\mu\text{M}$  at 300 K in the presence of warfarin (2.5  $\mu\text{M}$ ).
